# Supplementary material for: Lanthanide–organic frameworks constructed from naphthalenedisulfonates: structure, luminescence and luminescence sensing properties
Source: Royal Society of Chemistry journal article supplement (doi:10.1039/c6ce01028h), 2016-01-01
Supplement: c6ce01028h1.pdf [file c6ce01028h1.pdf]

## Supplementary Information

### Table of Contents

1. The solvent sensing experiment was performed as follows: Complex **1** (2.5 mg) was immersed in different organic solvents (5 mL), treated by ultrasonication for 30 minutes, and then aged for three days.

The metal ion sensing experiment was performed as follows: Complex **1** (2.5 mg) was immersed in different solution, (including aqueous solution, isopropanol, acetone, ethyl acetate) ( $10^{-2}$  mol/L, 5 mL) of  $M(\text{NO}_3)_n$  ( $M^{n+} = \text{K}^+, \text{Cr}^{3+}, \text{Ag}^+, \text{Ba}^{2+}, \text{Pb}^{2+}, \text{Mg}^{2+}, \text{Cd}^{2+}, \text{Ni}^{2+}, \text{Co}^{2+}, \text{Fe}^{3+}, \text{Zn}^{2+}, \text{Cu}^{2+}$ ), treated by ultrasonication for 30 min, and then aged for three days.

2. The PXRD and temperature-dependent PXRD patterns of complexes **1** (a, c) and **5** (b, d). (Fig. S1).
3. The structure of complex **1**: (a) 3D porous structure with the free water molecules, (b) helical chains, (c)  $\{3^6.4^8.5^6.6\}$  topology. (Fig. S2)
4.  $\text{N}_2$  adsorption–desorption curves of complex **1**. (Fig. S3)
5. 3D supramolecular structure of complex **4**. (Fig. S4)
6. 3D supramolecular architecture of complex **5** by the C–H $\cdots$ O hydrogen bonds. (Fig. S5)
7. The solid state emission spectra of complexes **2**, **4**, **6** and the free ligands. (Fig. S6)
8. Decay profile of solid state complexes **3** (a), **7** (b), **1** (c), **5** (d), activated complex **1** (e), complex **1** dispersed in  $\text{Fe}^{3+}$  aqueous solution (f), the solid state complex **1** after  $\text{Fe}^{3+}$  adsorption (g). (Fig. S7)
9. Solid state emission spectrum of complex **5**. Insert: excitation spectrum. (Fig. S8)
10. The luminescence intensity ( ${}^5\text{D}_0 \rightarrow {}^7\text{F}_2$ ) of three recyclable experiments of sensing for benzaldehyde. (Fig. S9)
11. The plot of  $I_0/I$  versus  $\text{Fe}^{3+}$  concentration. (Fig. S10)
12. Emission spectra of **1** in aqueous solutions of  $\text{Ba}^{2+}$ , mixed  $\text{Ba}^{2+}$  and  $\text{Fe}^{3+}$  (a);  $\text{Pb}^{2+}$ , mixed  $\text{Pb}^{2+}$  and  $\text{Fe}^{3+}$  (b);  $\text{Cr}^{3+}$ , mixed  $\text{Cr}^{3+}$  and  $\text{Fe}^{3+}$  (c);  $\text{Cd}^{2+}$ , mixed  $\text{Cd}^{2+}$  and  $\text{Fe}^{3+}$  (d). (Fig. S11)
13. UV-Vis absorption spectra of metal cations in aqueous solutions. (Fig. S12)
14. Emission spectra of **1** dispersed in acetone containing different metal ions. Insert: the  ${}^5\text{D}_0 \rightarrow {}^7\text{F}_2$  (618 nm) transition intensities ( $\lambda_{\text{ex}} = 358$  nm). (Fig. S13)
15. Emission spectra of **1** dispersed in ethyl acetate containing different cations. Insert: the  ${}^5\text{D}_0 \rightarrow {}^7\text{F}_2$  (618 nm) transition intensities ( $\lambda_{\text{ex}} = 358$  nm). (Fig. S14)
16. Selected bond lengths [ $\text{\AA}$ ] and angles [ $^\circ$ ] for complexes **1-7**. (Table S1)

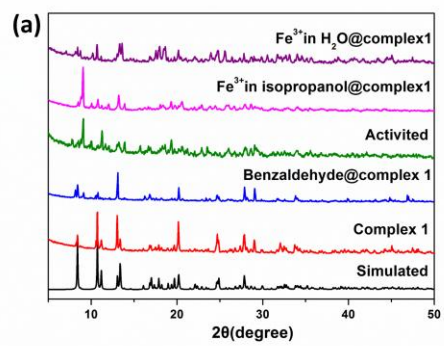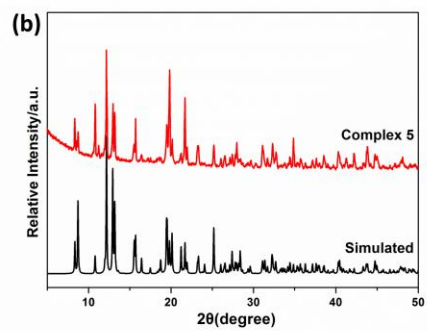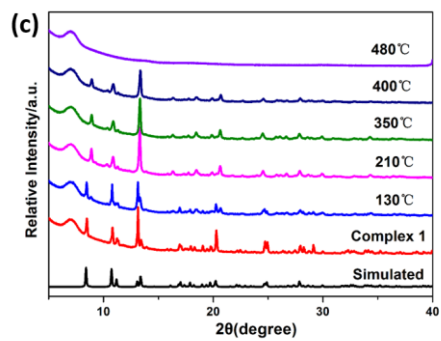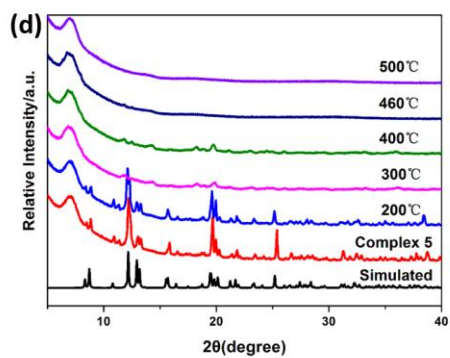

Fig. S1 The PXRD and temperature-dependent PXRD patterns of complexes **1** (a, c) and **5** (b, d).

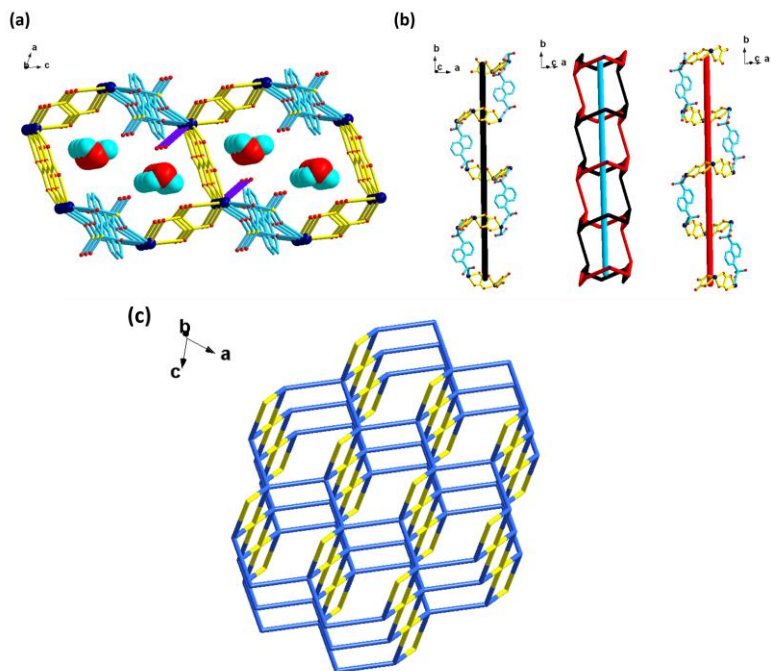

Fig. S2 Structure of complex 1: (a) 3D porous structure with the free water molecules, (b) helical chains, (c) {3<sup>6</sup>.4<sup>8</sup>.5<sup>6</sup>.6} topology.

The calculated results by Topological analysis<sup>12</sup>: Eu1 Point (Schlafli) symbol: {3<sup>6</sup>.4<sup>8</sup>.5<sup>6</sup>.6}  
 Extended point symbol: [3.3.3.3.3.3.4.4.4.4.4.4.4.4.5.5.5.5.5(2).5(2).6(5)]  
 Point (Schlafli) symbol for net: {3<sup>6</sup>.4<sup>8</sup>.5<sup>6</sup>.6}.

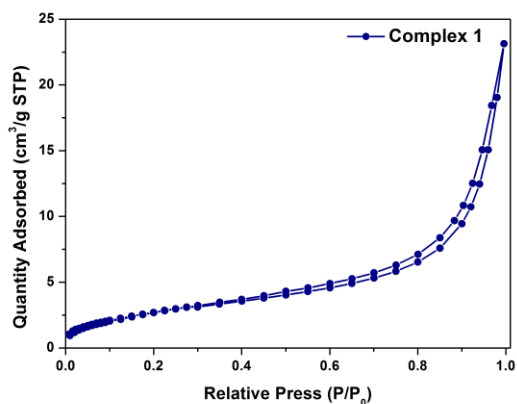

Fig S3 N<sub>2</sub> adsorption–desorption curves of complex 1.

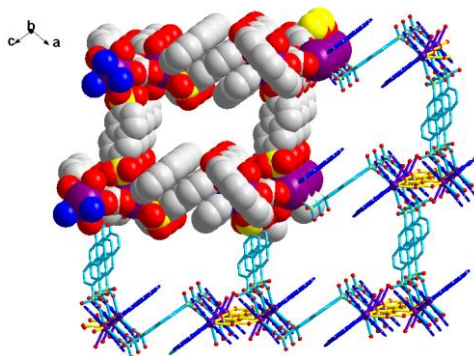

Fig. S4 3D supramolecular structure of complex **4**.

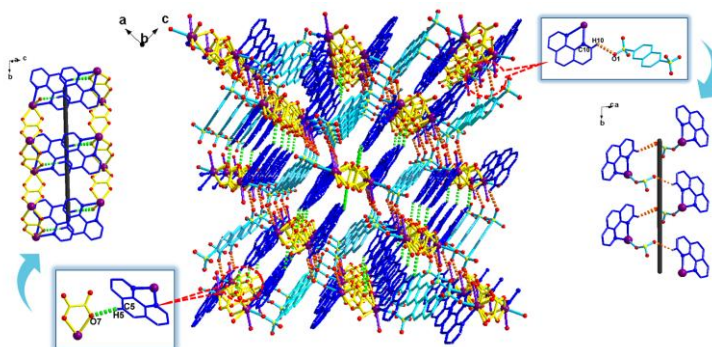

Fig. S5 3D supramolecular architecture of complex **5** by the C-H...O hydrogen bonds.

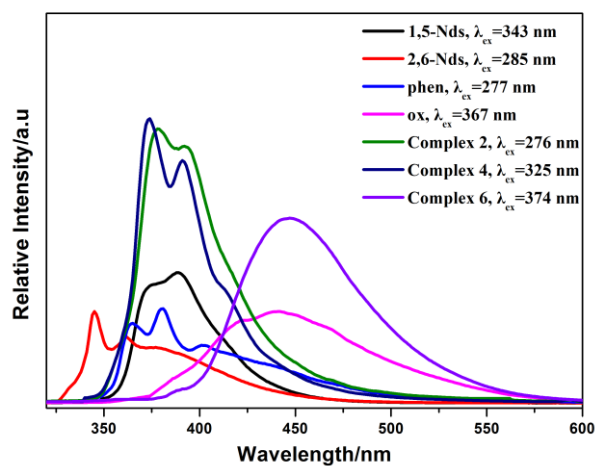

Fig. S6 The solid state emission spectra of complexes **2**, **4**, **6**, and the free ligands.

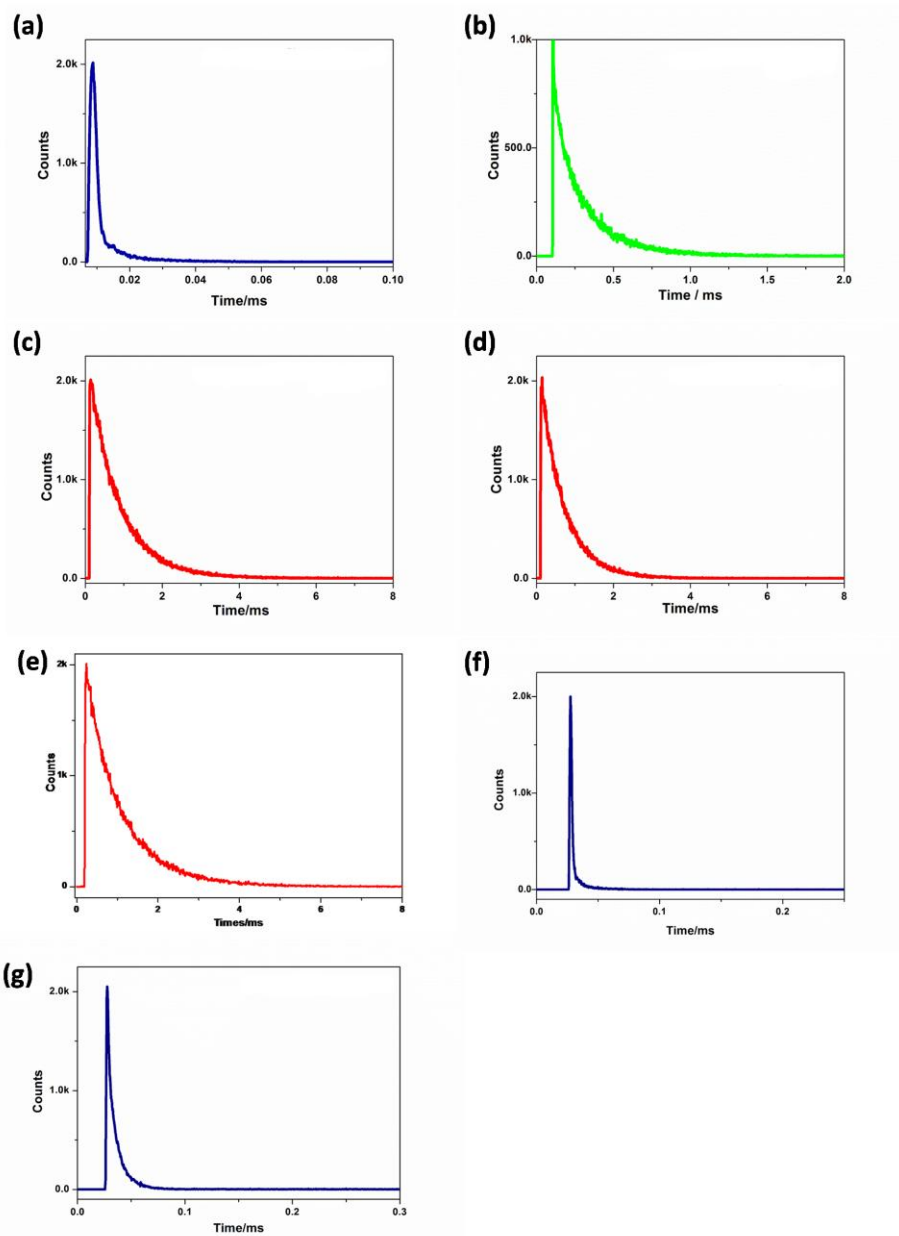

Fig. S7 Decay profile of solid state complexes **3** (a), **7** (b), **1** (c), **5** (d), activated complex **1** (e), complex **1** dispersed in  $\text{Fe}^{3+}$  aqueous solution (f), the solid state complex **1** after  $\text{Fe}^{3+}$  adsorption (g).

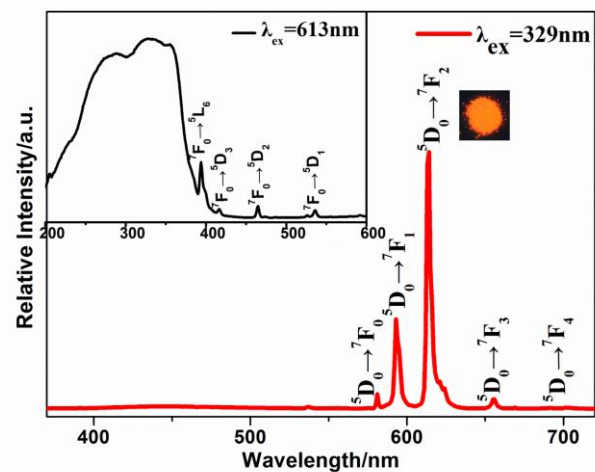

Fig. S8 Solid state emission spectrum of complex **5**. Insert: excitation spectrum.

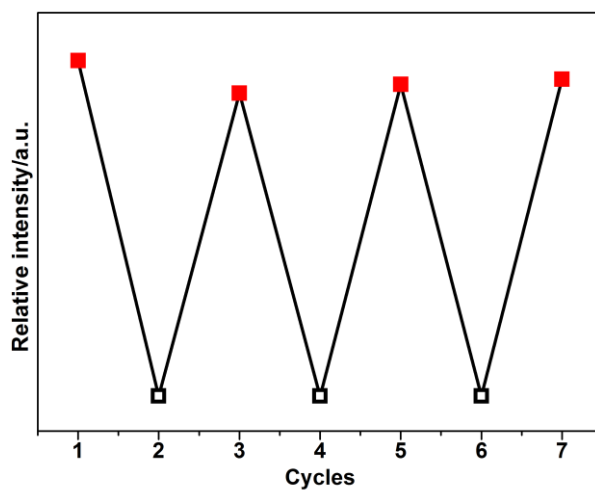

Fig. S9 The luminescence intensity ( ${}^5D_0 \rightarrow {}^7F_2$ ) of three recyclable experiments of sensing for benzaldehyde in isopropanol.

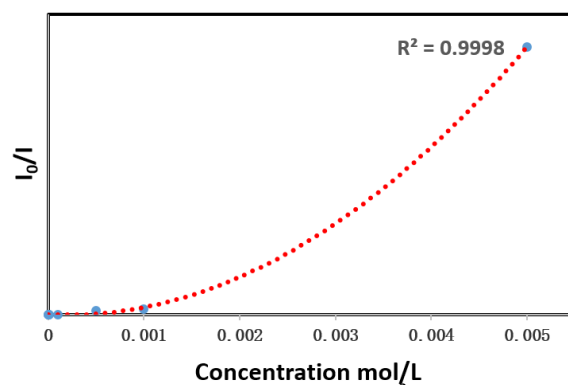

Fig. S10 The plot of  $I_0/I$  versus  $Fe^{3+}$  concentration.

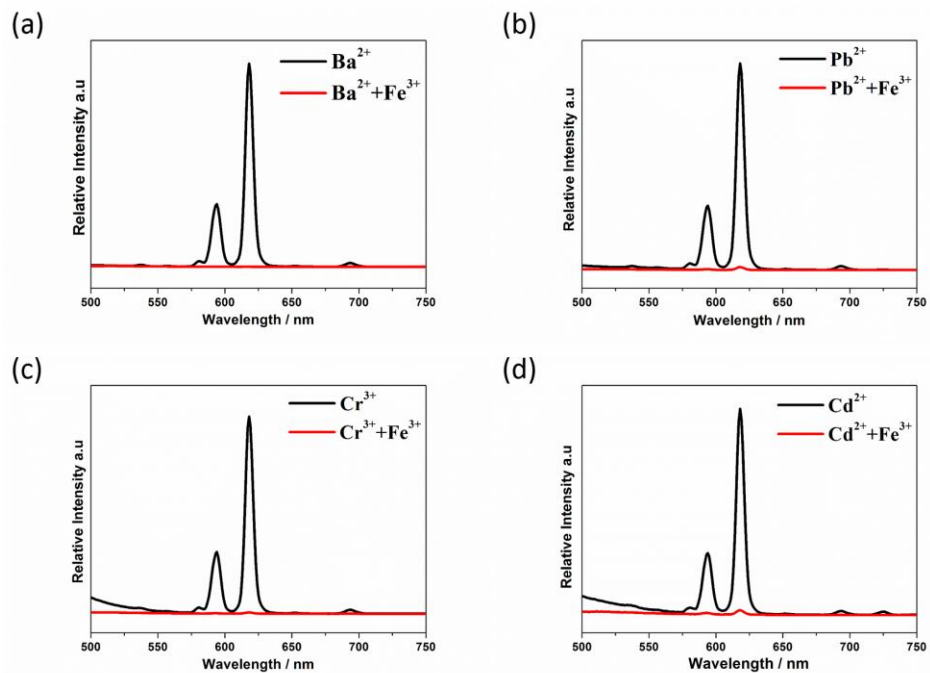

Fig. S11 Emission spectra of **1** in aqueous solutions of  $\text{Ba}^{2+}$ , mixed  $\text{Ba}^{2+}$  and  $\text{Fe}^{3+}$  (a);  $\text{Pb}^{2+}$ , mixed  $\text{Pb}^{2+}$  and  $\text{Fe}^{3+}$  (b);  $\text{Cr}^{3+}$ , mixed  $\text{Cr}^{3+}$  and  $\text{Fe}^{3+}$  (c);  $\text{Cd}^{2+}$ , mixed  $\text{Cd}^{2+}$  and  $\text{Fe}^{3+}$  (d).

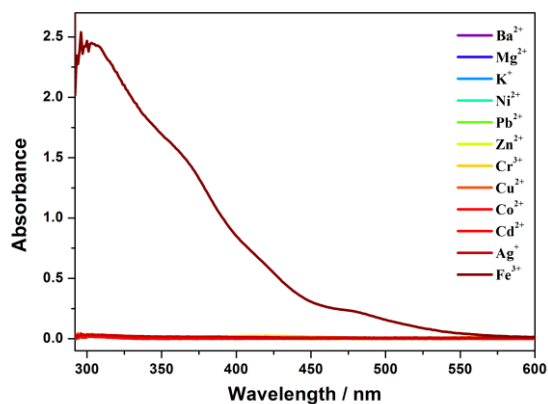

Fig. S12 UV-Vis absorption spectra of metal ions in aqueous solution.

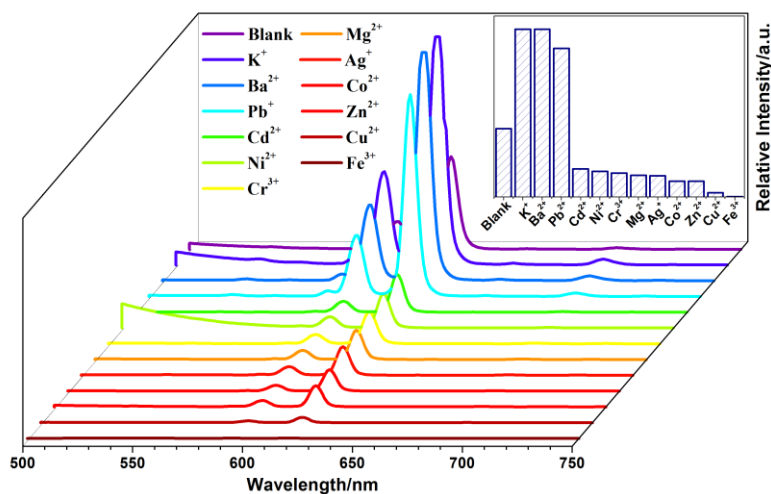

Fig. S13 Emission spectra of **1** dispersed in acetone containing different metal ions. Insert: the  ${}^5D_0 \rightarrow {}^7F_2$  (618 nm) transition intensities ( $\lambda_{\text{ex}} = 358$  nm).

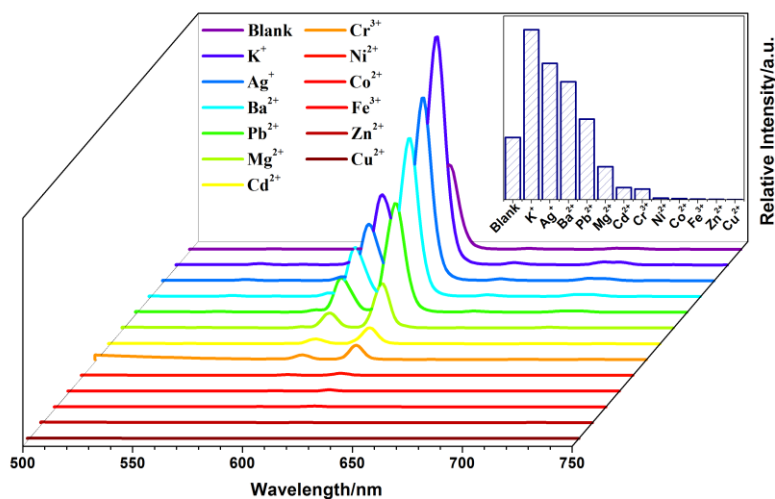

Fig. S14 Emission spectra of **1** dispersed in ethyl acetate containing different metal ions. Insert: the  ${}^5D_0 \rightarrow {}^7F_2$  (618 nm) transition intensities ( $\lambda_{\text{ex}} = 358$  nm).

Table S1 Selected bond lengths [ $\text{\AA}$ ] and angles [ $^\circ$ ] for complex **1-7**

| <b>1</b>          |            |                   |           |
|-------------------|------------|-------------------|-----------|
| Eu(1)-O(4)        | 2.405(5)   | Eu(1)-O(6)        | 2.487(5)  |
| Eu(1)-O(1)#1      | 2.418(5)   | Eu(1)-O(5)        | 2.524(6)  |
| Eu(1)-O(3)        | 2.432(5)   | Eu(1)-N(2)        | 2.594(6)  |
| Eu(1)-O(8)#2      | 2.441(5)   | Eu(1)-N(1)        | 2.667(7)  |
| Eu(1)-O(2)#3      | 2.451(5)   |                   |           |
| O(4)-Eu(1)-O(1)#1 | 77.51(19)  | O(8)#2-Eu(1)-O(5) | 68.18(17) |
| O(4)-Eu(1)-O(3)   | 130.51(17) | O(2)#3-Eu(1)-O(5) | 72.62(18) |



|                     |            |                   |            |
|---------------------|------------|-------------------|------------|
| O(1)#1-Eu(1)-O(3)   | 66.03(17)  | O(6)-Eu(1)-O(5)   | 68.27(18)  |
| O(4)-Eu(1)-O(8)#2   | 100.68(18) | O(4)-Eu(1)-N(2)   | 133.78(18) |
| O(1)#1-Eu(1)-O(8)#2 | 139.36(18) | O(1)#1-Eu(1)-N(2) | 82.50(19)  |
| O(3)-Eu(1)-O(8)#2   | 128.79(17) | O(3)-Eu(1)-N(2)   | 74.37(18)  |
| O(4)-Eu(1)-O(2)#3   | 66.59(17)  | O(8)#2-Eu(1)-N(2) | 69.62(18)  |
| O(1)#1-Eu(1)-O(2)#3 | 76.42(19)  | O(2)#3-Eu(1)-N(2) | 146.17(19) |
| O(3)-Eu(1)-O(2)#3   | 72.99(17)  | O(6)-Eu(1)-N(2)   | 82.82(18)  |
| O(8)#2-Eu(1)-O(2)#3 | 140.80(19) | O(5)-Eu(1)-N(2)   | 134.13(18) |
| O(4)-Eu(1)-O(6)     | 139.22(18) | O(4)-Eu(1)-N(1)   | 71.44(18)  |
| O(1)#1-Eu(1)-O(6)   | 133.64(17) | O(1)#1-Eu(1)-N(1) | 69.35(18)  |
| O(3)-Eu(1)-O(6)     | 67.69(17)  | O(3)-Eu(1)-N(1)   | 120.53(18) |
| O(8)#2-Eu(1)-O(6)   | 72.71(17)  | O(8)#2-Eu(1)-N(1) | 71.68(17)  |
| O(2)#3-Eu(1)-O(6)   | 92.83(17)  | O(2)#3-Eu(1)-N(1) | 130.22(17) |
| O(4)-Eu(1)-O(5)     | 71.97(19)  | O(6)-Eu(1)-N(1)   | 136.92(17) |
| O(1)#1-Eu(1)-O(5)   | 143.01(18) | O(5)-Eu(1)-N(1)   | 117.99(19) |
| O(3)-Eu(1)-O(5)     | 121.39(19) | N(2)-Eu(1)-N(1)   | 62.54(19)  |

Symmetry transformations used to generate equivalent atoms: #1 -x,-y+1,-z; #2 -x,-y+1,-z+1; #3 -x+1,-y+1,-z; #4 -x,-y,-z+1.

## 2

|                     |           |                   |           |
|---------------------|-----------|-------------------|-----------|
| La(1)-O(4)          | 2.492(2)  | La(1)-O(6)        | 2.552(2)  |
| La(1)-O(2)#1        | 2.522(2)  | La(1)-O(5)        | 2.619(3)  |
| La(1)-O(3)          | 2.523(2)  | La(1)-N(2)        | 2.706(3)  |
| La(1)-O(8)#2        | 2.524(2)  | La(1)-N(1)        | 2.751(3)  |
| La(1)-O(1)#3        | 2.527(2)  |                   |           |
| O(4)-La(1)-O(2)#1   | 64.80(7)  | O(8)#2-La(1)-O(5) | 68.61(8)  |
| O(4)-La(1)-O(3)     | 128.31(8) | O(1)#3-La(1)-O(5) | 141.65(8) |
| O(2)#1-La(1)-O(3)   | 74.27(8)  | O(6)-La(1)-O(5)   | 68.93(8)  |
| O(4)-La(1)-O(8)#2   | 102.86(8) | O(4)-La(1)-N(2)   | 133.48(8) |
| O(2)#1-La(1)-O(8)#2 | 140.68(8) | O(2)#1-La(1)-N(2) | 147.11(9) |
| O(3)-La(1)-O(8)#2   | 128.81(7) | O(3)-La(1)-N(2)   | 73.95(8)  |
| O(4)-La(1)-O(1)#3   | 75.62(8)  | O(8)#2-La(1)-N(2) | 69.12(9)  |
| O(2)#1-La(1)-O(1)#3 | 75.09(8)  | O(1)#3-La(1)-N(2) | 83.62(8)  |
| O(3)-La(1)-O(1)#3   | 64.06(7)  | O(6)-La(1)-N(2)   | 83.50(8)  |
| O(8)#2-La(1)-O(1)#3 | 140.81(8) | O(5)-La(1)-N(2)   | 134.42(8) |
| O(4)-La(1)-O(6)     | 140.11(8) | O(4)-La(1)-N(1)   | 73.60(8)  |
| O(2)#1-La(1)-O(6)   | 92.40(7)  | O(2)#1-La(1)-N(1) | 130.99(8) |
| O(3)-La(1)-O(6)     | 68.08(7)  | O(3)-La(1)-N(1)   | 117.40(8) |
| O(8)#2-La(1)-O(6)   | 73.59(7)  | O(8)#2-La(1)-N(1) | 71.76(8)  |
| O(1)#3-La(1)-O(6)   | 132.14(7) | O(1)#3-La(1)-N(1) | 70.34(8)  |
| O(4)-La(1)-O(5)     | 72.87(8)  | O(6)-La(1)-N(1)   | 136.61(7) |
| O(2)#1-La(1)-O(5)   | 72.06(8)  | O(5)-La(1)-N(1)   | 119.43(9) |
| O(3)-La(1)-O(5)     | 123.05(8) | N(2)-La(1)-N(1)   | 60.22(8)  |

Symmetry transformations used to generate equivalent atoms: #1 -x+1,-y+1,-z; #2 -x,-y+1,-z+1; #3 -x,-y+1,-z; #4 -x,-y,-z+1.

## 3

|              |          |            |          |
|--------------|----------|------------|----------|
| Sm(1)-O(6)#1 | 2.408(2) | Sm(1)-O(1) | 2.497(2) |
| Sm(1)-O(4)#2 | 2.439(2) | Sm(1)-O(8) | 2.538(3) |
| Sm(1)-O(3)#3 | 2.442(2) | Sm(1)-N(1) | 2.610(3) |
| Sm(1)-O(5)   | 2.451(2) | Sm(1)-N(2) | 2.676(3) |
| Sm(1)-O(7)   | 2.455(2) |            |          |

|                     |           |                   |           |
|---------------------|-----------|-------------------|-----------|
| O(6)#1-Sm(1)-O(4)#2 | 77.49(9)  | O(5)-Sm(1)-O(8)   | 121.18(9) |
| O(6)#1-Sm(1)-O(3)#3 | 100.68(9) | O(7)-Sm(1)-O(8)   | 72.17(9)  |
| O(4)#2-Sm(1)-O(3)#3 | 139.40(8) | O(1)-Sm(1)-O(8)   | 68.32(8)  |
| O(6)#1-Sm(1)-O(5)   | 130.67(8) | O(6)#1-Sm(1)-N(1) | 133.60(8) |
| O(4)#2-Sm(1)-O(5)   | 66.01(7)  | O(4)#2-Sm(1)-N(1) | 82.60(9)  |
| O(3)#3-Sm(1)-O(5)   | 128.64(8) | O(3)#3-Sm(1)-N(1) | 69.45(9)  |
| O(6)#1-Sm(1)-O(7)   | 66.63(8)  | O(5)-Sm(1)-N(1)   | 74.38(9)  |
| O(4)#2-Sm(1)-O(7)   | 76.36(9)  | O(7)-Sm(1)-N(1)   | 146.34(9) |
| O(3)#3-Sm(1)-O(7)   | 140.83(8) | O(1)-Sm(1)-N(1)   | 83.00(8)  |
| O(5)-Sm(1)-O(7)     | 73.15(8)  | O(8)-Sm(1)-N(1)   | 134.42(9) |
| O(6)#1-Sm(1)-O(1)   | 139.25(8) | O(6)#1-Sm(1)-N(2) | 71.80(8)  |
| O(4)#2-Sm(1)-O(1)   | 133.43(8) | O(4)#2-Sm(1)-N(2) | 69.35(8)  |
| O(3)#3-Sm(1)-O(1)   | 72.94(7)  | O(3)#3-Sm(1)-N(2) | 71.64(8)  |
| O(5)-Sm(1)-O(1)     | 67.48(7)  | O(5)-Sm(1)-N(2)   | 120.08(8) |
| O(7)-Sm(1)-O(1)     | 92.63(7)  | O(7)-Sm(1)-N(2)   | 130.50(8) |
| O(6)#1-Sm(1)-O(8)   | 71.92(9)  | O(1)-Sm(1)-N(2)   | 136.86(8) |
| O(4)#2-Sm(1)-O(8)   | 142.64(8) | O(8)-Sm(1)-N(2)   | 118.64(9) |
| O(3)#3-Sm(1)-O(8)   | 68.66(9)  | N(1)-Sm(1)-N(2)   | 61.99(9)  |

Symmetry transformations used to generate equivalent atoms: #1 -x+1,-y,-z; #2 -x,-y,-z; #3 -x,-y,-z+1;  
#4 -x,-y-1,-z+1.

#### 4

|                   |            |                   |            |
|-------------------|------------|-------------------|------------|
| La(1)-O(7)        | 2.461(3)   | La(1)-N(4)        | 2.698(3)   |
| La(1)-O(1)        | 2.512(3)   | La(1)-N(2)        | 2.733(3)   |
| La(1)-O(8)#3      | 2.521(3)   | La(1)-N(1)        | 2.754(4)   |
| La(1)-O(9)        | 2.567(3)   | La(1)-N(3)        | 2.754(4)   |
| La(1)-O(4)        | 2.579(3)   |                   |            |
| O(7)-La(1)-O(1)   | 87.01(11)  | O(9)-La(1)-N(2)   | 91.87(11)  |
| O(7)-La(1)-O(8)#3 | 64.84(9)   | O(4)-La(1)-N(2)   | 76.24(10)  |
| O(1)-La(1)-O(8)#3 | 140.32(10) | N(4)-La(1)-N(2)   | 132.18(11) |
| O(7)-La(1)-O(9)   | 75.51(11)  | O(7)-La(1)-N(1)   | 142.54(11) |
| O(1)-La(1)-O(9)   | 76.91(11)  | O(1)-La(1)-N(1)   | 76.59(11)  |
| O(8)#3-La(1)-O(9) | 69.57(11)  | O(8)#3-La(1)-N(1) | 108.51(10) |
| O(7)-La(1)-O(4)   | 85.61(11)  | O(9)-La(1)-N(1)   | 68.11(11)  |
| O(1)-La(1)-O(4)   | 135.77(10) | O(4)-La(1)-N(1)   | 129.20(10) |
| O(8)#3-La(1)-O(4) | 72.29(10)  | N(4)-La(1)-N(1)   | 124.34(11) |
| O(9)-La(1)-O(4)   | 141.71(11) | N(2)-La(1)-N(1)   | 59.77(11)  |
| O(7)-La(1)-N(4)   | 77.09(11)  | O(7)-La(1)-N(3)   | 137.18(10) |
| O(1)-La(1)-N(4)   | 67.38(11)  | O(1)-La(1)-N(3)   | 82.40(11)  |
| O(8)#3-La(1)-N(4) | 126.44(11) | O(8)#3-La(1)-N(3) | 137.26(11) |
| O(9)-La(1)-N(4)   | 135.60(12) | O(9)-La(1)-N(3)   | 140.19(11) |
| O(4)-La(1)-N(4)   | 68.45(10)  | O(4)-La(1)-N(3)   | 74.14(11)  |
| O(7)-La(1)-N(2)   | 131.83(10) | N(4)-La(1)-N(3)   | 60.52(11)  |
| O(1)-La(1)-N(2)   | 135.84(11) | N(2)-La(1)-N(3)   | 79.80(11)  |
| O(8)#3-La(1)-N(2) | 67.17(10)  | N(1)-La(1)-N(3)   | 74.23(11)  |

Symmetry transformations used to generate equivalent atoms: #1 -x+1,-y+1,-z+1; #2 -x+3,-y+2,-z+1;  
#3 -x+2,-y+1,-z.

#### 5

|            |          |              |          |
|------------|----------|--------------|----------|
| Eu(1)-O(3) | 2.369(6) | Eu(1)-O(4)#3 | 2.411(6) |
| Eu(1)-O(6) | 2.387(6) | Eu(1)-O(8)   | 2.464(6) |

|                     |          |                   |          |
|---------------------|----------|-------------------|----------|
| Eu(1)-O(7)#3        | 2.390(6) | Eu(1)-N(2)        | 2.561(7) |
| Eu(1)-O(5)          | 2.391(6) | Eu(1)-N(1)        | 2.581(7) |
| O(3)-Eu(1)-O(6)     | 90.3(2)  | O(4)#3-Eu(1)-O(8) | 69.6(2)  |
| O(3)-Eu(1)-O(7)#3   | 148.9(2) | O(3)-Eu(1)-N(2)   | 95.4(2)  |
| O(6)-Eu(1)-O(7)#3   | 109.4(2) | O(6)-Eu(1)-N(2)   | 158.0(2) |
| O(3)-Eu(1)-O(5)     | 92.3(2)  | O(7)#3-Eu(1)-N(2) | 75.4(2)  |
| O(6)-Eu(1)-O(5)     | 67.5(2)  | O(5)-Eu(1)-N(2)   | 133.2(2) |
| O(7)#3-Eu(1)-O(5)   | 74.5(2)  | O(4)#3-Eu(1)-N(2) | 84.1(2)  |
| O(3)-Eu(1)-O(4)#3   | 142.5(2) | O(8)-Eu(1)-N(2)   | 80.1(2)  |
| O(6)-Eu(1)-O(4)#3   | 78.6(2)  | O(3)-Eu(1)-N(1)   | 73.8(2)  |
| O(7)#3-Eu(1)-O(4)#3 | 67.1(2)  | O(6)-Eu(1)-N(1)   | 137.5(2) |
| O(5)-Eu(1)-O(4)#3   | 115.2(2) | O(7)#3-Eu(1)-N(1) | 75.6(2)  |
| O(3)-Eu(1)-O(8)     | 73.4(2)  | O(5)-Eu(1)-N(1)   | 74.0(2)  |
| O(6)-Eu(1)-O(8)     | 81.3(2)  | O(4)#3-Eu(1)-N(1) | 136.1(2) |
| O(7)#3-Eu(1)-O(8)   | 131.8(2) | O(8)-Eu(1)-N(1)   | 128.0(2) |
| O(5)-Eu(1)-O(8)     | 145.7(2) | N(2)-Eu(1)-N(1)   | 64.3(2)  |

Symmetry transformations used to generate equivalent atoms: #1 -x+2,-y+1,-z+1; #2 -x+1,y+1/2,-z+3/2; #3 -x+1,y-1/2,-z+3/2

### 6

|                   |            |                    |            |
|-------------------|------------|--------------------|------------|
| Gd(1)-O(1)        | 2.357(4)   | Gd(1)-O(7)#1       | 2.398(5)   |
| Gd(1)-O(5)        | 2.379(5)   | Gd(1)-O(1W)        | 2.421(5)   |
| Gd(1)-O(4)        | 2.385(5)   | Gd(1)-N(1)         | 2.543(6)   |
| Gd(1)-O(6)        | 2.386(5)   | Gd(1)-N(2)         | 2.566(6)   |
| O(1)-Gd(1)-O(5)   | 89.80(16)  | O(7)#1-Gd(1)-O(1W) | 69.51(17)  |
| O(1)-Gd(1)-O(4)   | 149.14(17) | O(1)-Gd(1)-N(1)    | 95.81(17)  |
| O(5)-Gd(1)-O(4)   | 109.69(17) | O(5)-Gd(1)-N(1)    | 157.44(18) |
| O(1)-Gd(1)-O(6)   | 91.83(17)  | O(4)-Gd(1)-N(1)    | 75.48(18)  |
| O(5)-Gd(1)-O(6)   | 67.90(16)  | O(6)-Gd(1)-N(1)    | 133.45(18) |
| O(4)-Gd(1)-O(6)   | 74.79(18)  | O(7)#1-Gd(1)-N(1)  | 84.07(18)  |
| O(1)-Gd(1)-O(7)#1 | 142.06(17) | O(1W)-Gd(1)-N(1)   | 79.95(19)  |
| O(5)-Gd(1)-O(7)#1 | 78.20(18)  | O(1)-Gd(1)-N(2)    | 74.07(17)  |
| O(4)-Gd(1)-O(7)#1 | 67.52(17)  | O(5)-Gd(1)-N(2)    | 137.98(18) |
| O(6)-Gd(1)-O(7)#1 | 115.64(17) | O(4)-Gd(1)-N(2)    | 75.52(17)  |
| O(1)-Gd(1)-O(1W)  | 73.12(17)  | O(6)-Gd(1)-N(2)    | 74.02(17)  |
| O(5)-Gd(1)-O(1W)  | 80.83(18)  | O(7)#1-Gd(1)-N(2)  | 136.33(17) |
| O(4)-Gd(1)-O(1W)  | 132.04(17) | O(1W)-Gd(1)-N(2)   | 127.81(18) |
| O(6)-Gd(1)-O(1W)  | 145.43(18) | N(1)-Gd(1)-N(2)    | 64.35(19)  |

Symmetry transformations used to generate equivalent atoms: #1 -x+2,y-1/2,-z-1/2; #2 -x+2,y+1/2,-z-1/2; #3 -x+1,-y,-z

### 7

|                   |            |                   |            |
|-------------------|------------|-------------------|------------|
| Tb(1)-O(1)        | 2.345(4)   | Tb(1)-O(6)#1      | 2.383(4)   |
| Tb(1)-O(8)        | 2.363(4)   | Tb(1)-O(4)        | 2.428(4)   |
| Tb(1)-O(7)        | 2.367(4)   | Tb(1)-N(2)        | 2.523(4)   |
| Tb(1)-O(5)#1      | 2.376(4)   | Tb(1)-N(1)        | 2.549(4)   |
| O(1)-Tb(1)-O(8)   | 89.67(13)  | O(6)#1-Tb(1)-O(4) | 69.43(14)  |
| O(1)-Tb(1)-O(7)   | 91.81(13)  | O(1)-Tb(1)-N(2)   | 96.20(14)  |
| O(8)-Tb(1)-O(7)   | 68.18(13)  | O(8)-Tb(1)-N(2)   | 156.73(14) |
| O(1)-Tb(1)-O(5)#1 | 148.86(13) | O(7)-Tb(1)-N(2)   | 133.79(13) |
| O(8)-Tb(1)-O(5)#1 | 110.14(14) | O(5)#1-Tb(1)-N(2) | 75.22(15)  |

|                     |            |                   |            |
|---------------------|------------|-------------------|------------|
| O(7)-Tb(1)-O(5)#1   | 74.76(14)  | O(6)#1-Tb(1)-N(2) | 83.63(14)  |
| O(1)-Tb(1)-O(6)#1   | 142.36(13) | O(4)-Tb(1)-N(2)   | 80.16(15)  |
| O(8)-Tb(1)-O(6)#1   | 78.11(13)  | O(1)-Tb(1)-N(1)   | 73.81(13)  |
| O(7)-Tb(1)-O(6)#1   | 115.37(14) | O(8)-Tb(1)-N(1)   | 137.75(13) |
| O(5)#1-Tb(1)-O(6)#1 | 67.51(13)  | O(7)-Tb(1)-N(1)   | 73.68(13)  |
| O(1)-Tb(1)-O(4)     | 73.45(13)  | O(5)#1-Tb(1)-N(1) | 75.45(14)  |
| O(8)-Tb(1)-O(4)     | 79.99(14)  | O(6)#1-Tb(1)-N(1) | 136.60(13) |
| O(7)-Tb(1)-O(4)     | 145.06(15) | O(4)-Tb(1)-N(1)   | 128.56(14) |
| O(5)#1-Tb(1)-O(4)   | 132.09(14) | N(2)-Tb(1)-N(1)   | 65.27(14)  |

Symmetry transformations used to generate equivalent atoms: #1 -x,y+1/2,-z+1/2; #2 -x,y-1/2,-z+1/2;  
#3 -x+1,-y+2,-z
